# Supplementary material
Source: PubMed Central journal article supplement (PMC3757305)

a

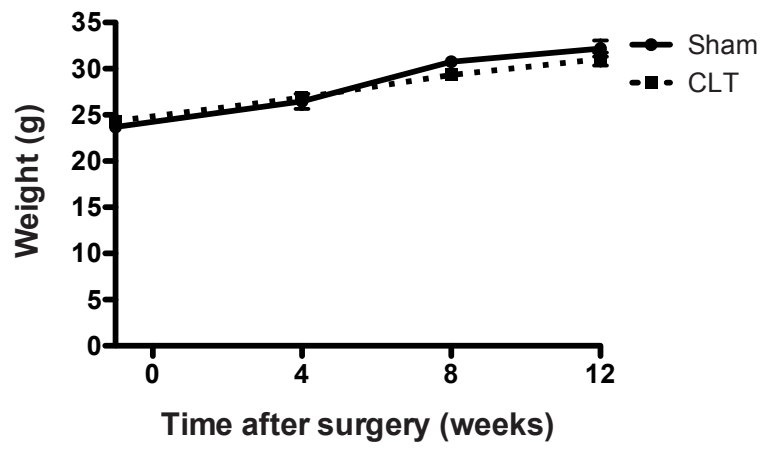

b

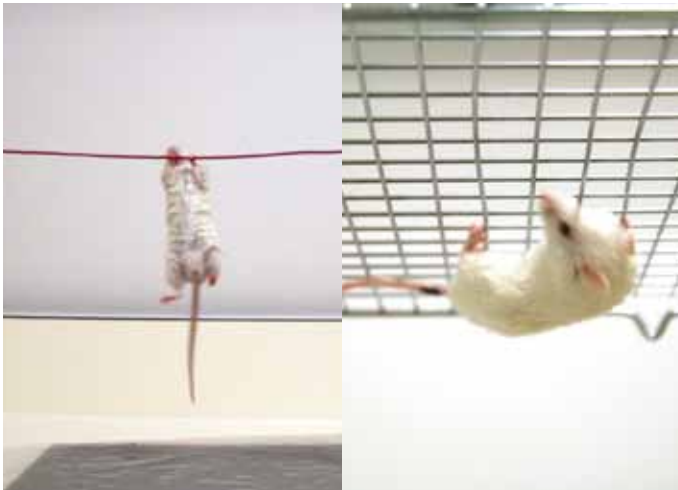

Supplement: NIHMS508189-supplement-01.pdf [file NIHMS508189-supplement-01.pdf]
